# Supplementary material
Source: ML conference proceedings conference paper supplement (https://openaccess.thecvf.com/content/CVPR2021/html/Wang_PointAugmenting_Cross-Modal_Augmentation_CVPR_2021_paper.html)
Supplement: Supplementary file 2 [file Wang_PointAugmenting_Cross-Modal_Augmentation_CVPR_2021_supplemental.zip]

Archive with 2 entries (2 files):
- 06010-demo.mp4
- 06010-supp.pdf
